# Supplementary material for: Functional Characterization of Flavanone 3-Hydroxylase (F3H) and Its Role in Anthocyanin and Flavonoid Biosynthesis in Mulberry
Source: MDPI journal article supplement (doi:10.3390/molecules27103341), 2022-05-23
Supplement: s1 [file s1]

Table S1 sequences used for phylogenetic analysis.

| Symbols | Accession number | Species           |
|---------|------------------|-------------------|
|         |                  | Arabidopsis       |
| AtF3H   | NP_190692.1      | thaliana          |
| GbF3H   | BAJ17667.1       | Gynura bicolor    |
| NtF3H   | AAC15414.1       | Nicotiana tabacum |
|         |                  | Garcinia          |
| GmF3H   | ACM62745.1       | mangostana        |
|         |                  | Gossypium         |
| GhF3H   | ABA01482.1       | hirsutum          |
| CsF3H   | AAT68774.1       | Camellia sinensis |
| CmF3H   | ACR77526.1       | Citrus maxima     |
| VvF3H   | NP_001268034     | Vitis vinifera    |
|         |                  | Fragaria ×        |
| FaFLS   | AAZ78661         | ananassa          |
| PpFLS   | AJO70134         | Prunus persica    |
| AtFLS1  | At5g08640        | A.thaliana        |
| AtFLS3  | At5g63590        | A.thaliana        |
| PpANS   | AJA79070         | Prunus persica    |
| PaANS   | ADZ54785         | Prunus avium      |
|         |                  | Fragaria ×        |
| FaANS   | AFK32781         | ananassa          |
| VvANS   | ABV82967         | Vitis vinifera    |
| MdANS   | AAD26205         | Malus domestica   |
| GmANS   | AAR26525.1       | Glycine max       |

Table S2 Primers used in this study.

| Primer name | 5'-3' sequence                           | notes          |
|-------------|------------------------------------------|----------------|
| F3H-F       | ATGACTCCCAAACTCTCAC                      | Cloning        |
| F3H-R       | TTAAGCAACAATCCGCTCAA                     | Cloning        |
| Nib-F3H-F   | agtgtctctgtccagtctATGACTCCCAAACTCTCAC    | Overexpression |
| Nib-F3H-R   | ggtctcagcagaccacaagtTTAAGCAACAATCCGCTCAA | Overexpression |
| NtActin-QR  | GAGGGAAAGAACAGCCTGAATG                   | qRT-PCR        |
| NtActin-QF  | TCACAGAAGCTCCTCCTAATCCA                  | qRT-PCR        |
| AtActin-QF  | GCTCCTCTTAACCCAAAGGC                     | qRT-PCR        |
| AtActin-QR  | CACACCATCACCAGAATCCAGC                   | qRT-PCR        |
| CHS-QF      | TGGTGTAGCCTCAATTCTAGC                    | qRT-PCR        |
| CHS-QR      | CCCACTCTTTGAGGGCCTCTA                    | qRT-PCR        |
| F3H-QF      | CTACAACGAATTCAGCACCGA                    | qRT-PCR        |
| F3H-QR      | GCGGGTACGAGAAGTATGTC                     | qRT-PCR        |
| ANS-QF      | AGGGAGAAATGCAAGGAGGAG                    | qRT-PCR        |
| ANS-QR      | TACTCACTCGTCGCCTCTTT                     | qRT-PCR        |
| F3'H-QF     | ATGGTCATGAGGGTGGCAAG                     | qRT-PCR        |

|           |                               |         |
|-----------|-------------------------------|---------|
| F3'H-QR   | CGTCGAGTCTCTGGACTTGG          | qRT-PCR |
| FIS1-QF   | CCCCTCTCGCATCAACTACC          | qRT-PCR |
| FIS1-QR   | CCCACCGCCTCTTTGAGAAT          | qRT-PCR |
| FIS2-QF   | CTGGATCGACGCCAAGTACG          | qRT-PCR |
| FIS2-QR   | TGGGTCCCCTACAACTCC            | qRT-PCR |
| CHI2-QF   | TCTGTTTCTTGGCGGCAG            | qRT-PCR |
| CHI2-QR   | ACCCGGCGGGAAATTCTGAT          | qRT-PCR |
| F3H-VGS-F | GCTCTAGACTACAACGAATTCAGCACCGA | VIGS    |
| F3H-VGS-R | CGGGATCCGCGGGTACGAGAAGTATGTC  | VIGS    |

---
